# Supplementary material for: Sex-Specific Regulation of miR-29b in the Myocardium Under Pressure Overload is Associated with Differential Molecular, Structural and Functional Remodeling Patterns in Mice and Patients with Aortic Stenosis
Source: PubMed Central journal article supplement (PMC7226763; doi:10.3390/cells9040833), 2020-03-30
Supplement: cells-09-00833-s001.pdf [file cells-09-00833-s001.pdf]

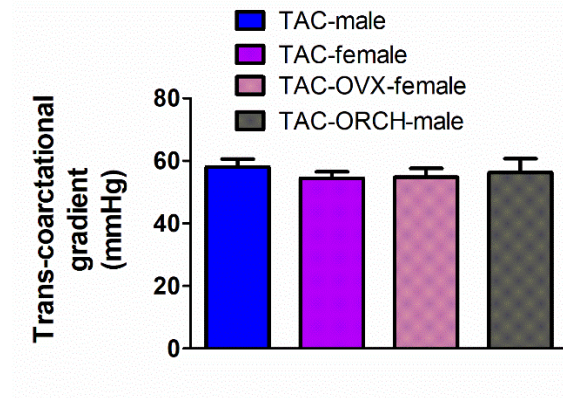

**Figure S1.** Mean trans-coarctational gradients determined by Doppler echocardiography 4 weeks after transverse aortic constriction (TAC). Male ( $n = 18$ ), female ( $n = 29$ ), ovariectomised (OVX) ( $n = 5$ ) and orchietomised (ORCH) male ( $n = 5$ ) mice.

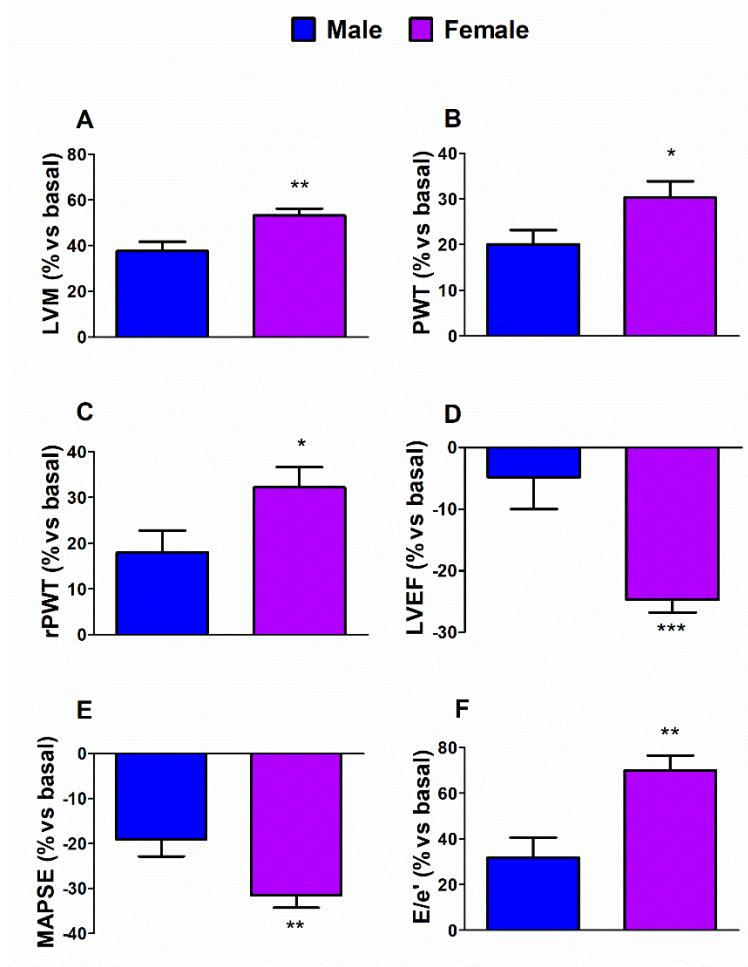

**Figure S2.** Percent change 4 weeks after TAC versus basal of morphological and functional echocardiographic parameters in male and female mice. A: LVM, LV mass; B: PWT, posterior wall thickness;

C: rPWT, relative posterior wall thickness; D: LVEF, LV ejection fraction; E: MAPSE, mitral annular plane systolic excursion; F:  $E/e'$ , ratio of peak early transmitral flow velocity to peak early myocardial tissue 1 velocity ( $e'$ ). Data are means  $\pm$  SEM. \* $p < 0.05$ , \*\* $p < 0.01$ , \*\*\* $p < 0.001$  (Unpaired t-test).

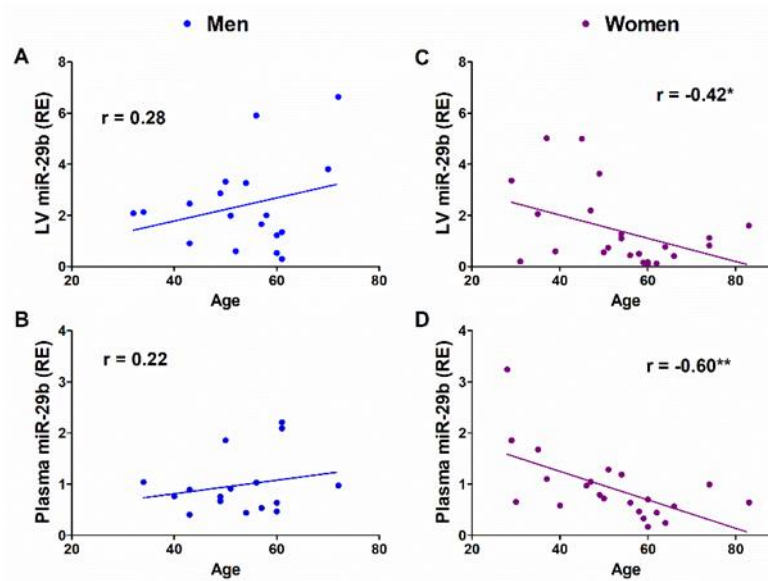

**Figure S3.** Linear regression and Pearson's correlation analyses between miR-29b expression in the LV and plasma with age in control patients of any age. A: miR-29b relative expression in the LV (RE vs RNU6b) and B: plasma (RE vs Cel-39) from control men. C: miR-29b relative expression in the LV (RE vs RNU6b) and D: plasma (RE vs Cel-39) from control women.  $r$ , Pearson's correlation coefficient (\* $p < 0.05$ , \*\* $p < 0.01$ ).
